## **The synthetic triterpenoids CDDO-TFEA and CDDO-Me, but not CDDO, are potent BACH1 inhibitors**

Laura Casares<sup>1</sup>, Rita Moreno<sup>1</sup>, Maureen Higgins<sup>1</sup>, Sharadha Dayalan Naidu<sup>1</sup>, Graham Neill<sup>1</sup>, Lena Cassin<sup>2</sup>, Anders E. Klib<sup>3</sup>, Esben B. Svenningsen<sup>3</sup>, Tadashi Honda<sup>4</sup>, Thomas B. Poulsen<sup>3</sup>, Alben T. Dinkova-Kostova<sup>1\*</sup>, David Olgarnier<sup>2\*</sup> and Laureano de la Vega<sup>1\*</sup>.

<sup>1</sup> *Jacqui Wood Cancer Centre, Division of Cellular Medicine, School of Medicine, University of Dundee, UK.*

<sup>2</sup> *Department of Biomedicine, Health, Aarhus University, 8000, Denmark.*

<sup>3</sup> *Department of Chemistry, Aarhus University, Denmark*

<sup>4</sup> *Department of Chemistry and Institute of Chemical Biology & Drug Discovery, Stony Brook University, Stony Brook, NY 11794-3400, USA*

*\* Equal Senior Authorship*

**Corresponding Author:** Laureano de la Vega (E-mail: [l.delavega@dundee.ac.uk](mailto:l.delavega@dundee.ac.uk));

**Short title:** CDDO-derivatives target BACH1

**Keywords:** BACH1/ HMOX1/ CDDO/ NRF2

## Abstract

1 The transcription factor BACH1 is a potential target against a variety of chronic conditions  
2 linked to oxidative stress and inflammation, and formation of cancer metastasis. However,  
3 only a few BACH1 degraders/inhibitors have been described. BACH1 is a transcriptional  
4 repressor of heme oxygenase 1 (HMOX1), which is positively regulated by transcription  
5 factor NRF2 and is highly inducible by derivatives of the synthetic oleanane triterpenoid 2-  
6 cyano-3,12-dioxooleana-1,9(11)-dien-28-oic acid (CDDO). Most of the therapeutic activities  
7 of these compounds are due to their anti-inflammatory and antioxidant properties, which  
8 are widely attributed to their ability to activate NRF2. However, with such a broad range of  
9 action, these drugs may have other molecular targets that have not been fully identified and  
10 could also be of importance for their therapeutic profile. Herein we identified BACH1 as a  
11 target of CDDO-derivatives, but not CDDO. While both CDDO and CDDO-derivatives activate  
12 NRF2 similarly, only CDDO-derivatives inhibit BACH1, which explains the much higher  
13 potency of CDDO-derivatives as HMOX1 inducers compared with unmodified CDDO.  
14 Notably, we demonstrate that CDDO-derivatives inhibit BACH1 via a novel mechanism that  
15 reduces BACH1 nuclear levels while accumulating its cytoplasmic form. Altogether, our  
16 study identifies CDDO-derivatives as dual KEAP1/BACH1 inhibitors, providing a rationale for  
17 further therapeutic uses of these drugs.

18

## 19 Background

20 The synthetic oleanane triterpenoid 2-cyano-3,12-dioxooleana-1,9(11)-dien-28-oic acid  
21 (CDDO) and its derivatives, including CDDO-methyl ester (CDDO-Me, also known as  
22 Bardoxolone methyl) and CDDO-trifluoroethyl amide (CDDO-TFEA), are a class of  
23 multifunctional drugs with anti-inflammatory and antioxidant properties that have a wide

24 range of therapeutic uses, from neuroprotection to anticancer, in a variety of preclinical  
25 models [1-5]. These compounds were first identified as inducers of heme oxygenase 1  
26 (HMOX1), an inducible enzyme with potent antioxidant and anti-inflammatory properties,  
27 and later as potent activators of the transcription factor NRF2 [6]. Extensive structure-  
28 activity studies led to the development of the most potent NRF2 activators known to date,  
29 some of which, including CDDO-Me, are currently in advanced clinical trials [7, 8]. NRF2 is  
30 largely controlled at the protein stability level, and its main regulator, KEAP1 (Kelch-like  
31 ECH-associated protein 1), is a substrate adaptor for the Cul3-based E3 ubiquitin ligase, and  
32 in normal conditions, KEAP1 targets NRF2 for proteasomal degradation, keeping the levels  
33 of NRF2 low in cells [9]. KEAP1 is also a sensor for electrophiles, such as CDDO and its  
34 derivatives, which chemically modify cysteines in KEAP1 [10, 11] preventing it from  
35 targeting NRF2 for degradation, leading to a rapid nuclear accumulation of NRF2 and  
36 transcription of its target genes [9].

37

38 In addition to NRF2, the transcription of *HMOX1* is also regulated by BACH1 (broad complex,  
39 tramtrack and bric à brac and cap'n'collar homology 1), a transcription factor that competes  
40 with NRF2 for binding to sequences called antioxidant response elements (AREs) within its  
41 promoter region. Unlike NRF2 which activates *HMOX1* transcription, BACH1 represses it [12-  
42 15]. While KEAP1 inhibitors/NRF2 activators induce the expression of numerous  
43 cytoprotective genes, BACH1 inhibitors/degraders activate only a limited subset of these  
44 genes, although they are extremely potent at inducing *HMOX1*.

45

46 Despite their therapeutic potential [16-23], only a few BACH1 inhibitors/degraders have  
47 been identified so far. The most widely used BACH1 degrader is hemin, a heme derivative.

48 Hemin binds to BACH1, promoting its nuclear export and subsequent cytoplasmic  
49 degradation [24-26]. Other degraders/inhibitors are the natural phytocannabinoid  
50 cannabidiol [27], the synthetic compound HPP-4382 [19], and its derivatives [16], although  
51 their mechanisms of action are not clear. Based on the differential effect of BACH1 versus  
52 KEAP1 inhibitors, we expect drugs with dual activity, targeting both transcription factors, to  
53 have broader and stronger anti-inflammatory and antioxidant properties with potentially  
54 greater therapeutic value than drugs targeting either protein individually. In that regard, we  
55 have recently reported a chemical derivative of cannabidiol with dual activity [28], although  
56 its efficacy *in vivo* has not been established.

57

58 CDDO-derivatives are more potent than CDDO at inducing HMOX1 [6, 29] and have a better  
59 therapeutic profile, although the reason for this increased activity is unclear. In this work we  
60 demonstrate that CDDO derivatives (particularly CDDO-Me and CDDO-TFEA) are potent  
61 BACH1 inhibitors, while CDDO is not. This dual KEAP1 and BACH1 inhibition explains their  
62 enhanced potency as *HMOX1* inducers and may also explain some of their superior  
63 therapeutic profile.

64

## 65 **Materials and Methods**

### 66 **Cell culture**

67 Cells were grown in RPMI (HaCaT and HK2) or DMEM (H1299, A549) containing 10% FBS at  
68 37°C and 5% CO<sub>2</sub>. LX2 cells were maintained in high glucose DMEM media with 2mM L-  
69 Glutamine, without sodium pyruvate and with 2% FBS EmbryoMax<sup>TM</sup> (Sigma-Aldrich, St.  
70 Louis, MO, USA). HaCaT cells have been validated by STR profiling and were routinely tested  
71 for mycoplasma. LX2 cells were obtained from SIGMA, and HK2, H1299 and A549 cells were

72 obtained from ATCC and also tested for mycoplasma. CRISPR-edited NRF2-KO HaCaT cells  
73 were produced by transfecting HaCaT cells with pLentiCRISPR-v2 (a gift from Dr Feng Zhang,  
74 Addgene plasmid #52961) containing a guide RNA directed against the exon 2 of the NFE2L2  
75 locus (which encodes NRF2) (5'-TGGAGGCAAGATATAGATCT-3'). HaCaT BACH1-KO and  
76 HaCaT NRF2-KO/BACH1-KO cells were generated by transfecting either HaCaT WT or HaCaT  
77 NRF2-KO cells with two different pLentiCRISPR-v2 plasmids containing each one a guide RNA  
78 against the first exon and the second exon of BACH1, respectively (5'-  
79 CGATGTCACCATCTTTGTGG-3', 5'-GACTCTGAGACGGACACCGA-3'). All CRISPR-edited cell  
80 lines were selected with puromycin for 2 days, cells were clonally selected by serial dilution,  
81 and positive clones were identified as previously described [30]. Control cells, referred as  
82 HaCaT wild type (HaCaT WT), are the pooled population of surviving cells transfected with  
83 an empty pLentiCRISPRv2 vector treated with puromycin.

#### 84 **Antibodies and reagents**

85 Antibodies against BETA-ACTIN (C-4), BACH1 (F-9) and LAMIN B2 (C-20) were obtained from  
86 Santa Cruz Biotechnology (Dallas, Texas, USA). Anti-NRF2 (D1Z9C) was obtained from Cell  
87 Signalling Technology (Danvers, MA, USA) and anti-HMOX1 was purchased from Biovision  
88 (San Francisco, CA, USA). Antibody against ALPHA-TUBULIN was obtained from Sigma-  
89 Aldrich (St. Louis, MO, USA). HRP-conjugated secondary antibodies were obtained from Life  
90 Technologies (Carlsbad, California, USA). Dimethyl sulfoxide (DMSO) was from Sigma-  
91 Aldrich. R,S-sulforaphane (SFN) was purchased from LKT Laboratories (St. Paul, MN, USA).  
92 (±)-TBE-31 was synthesized as described [31, 32]. CDDO and CDDO-derivatives were  
93 obtained from Cayman Chemicals (Ann Arbor, MI, USA). MG132 was obtained from Santa  
94 Cruz Biotechnology; Leptomycin B from Cayman Chemicals, MLN4924 and Selinexor (KPT-

95 330) from Selleckchem (Houston, TX, USA) and Actinomycin D and Cycloheximide from  
96 Sigma.

### 97 **Plasmids**

98 BACH1-RFP, and BACH1- C435, C46, C492, C646A (Hemin resistant) -RFP were generated as  
99 follows. BACH1 WT or Hemin-resistant inserts were synthesised and cloned into Plenti-CMV-  
100 MCS-RFP-SV-puro. Plenti-CMV-MCS-RFP-SV-puro was a gift from Jonathan Garlick & Behzad  
101 Gerami-Naini (Addgene plasmid # 109377; <http://n2t.net/addgene:109377>;  
102 RRID:Addgene\_109377).

### 103 **Quantitative real time PCR (rt-qPCR)**

104 RNA from cells was extracted using GeneJET RNA Purification Kit (Thermo Fisher Scientific)  
105 and 500 ng of RNA per sample was reverse-transcribed to cDNA using Omniscript RT kit  
106 (Qiagen) supplemented with RNase inhibitor according to the manufacturer's instructions.  
107 Resulting cDNA was analysed using TaqMan Universal Master Mix II (Life Technologies,  
108 Carlsbad, CA, USA) as well as corresponding Taqman probes. Gene expression was  
109 determined using a QuantStudio 7 Flex qPCR machine by the comparative  $\Delta\Delta$ CT method. All  
110 experiments were performed at least in triplicates and data were normalized to the  
111 housekeeping gene HPRT1. Taqman probes used: HPRT1 Hs02800695\_m1; HMOX1  
112 Hs01110250\_m1; AKR1B10 Hs00252524\_m1.

### 113 **Cell lysis and western blot**

114 Cells were washed and harvested in ice-cold phosphate-buffered saline (PBS). For whole cell  
115 extracts, cells were lysed in RIPA buffer supplemented with phosphate and protease  
116 inhibitors [50 mM Tris- HCl pH 7.5, 150 mM NaCl, 2 mM EDTA, 1% NP40, 0.5% sodium  
117 deoxycholate, 0.5 mM Na<sub>3</sub>VO<sub>4</sub>, 50 mM NaF, 2 µg/mL leupeptine, 2 µg/mL aprotinin, 0.05  
118 mM pefabloc]. Lysates were sonicated for 15 s at 20% amplitude and then cleared by

119 centrifugation for 15 min at 4 °C. For subcellular fractionation, cells were resuspended in  
120 400µl of low-salt buffer A (10mM Hepes/KOH pH7.9, 10mM KCL, 0.1mM EDTA,  
121 0.1mM EGTA, 1mM β-Mercaptoethanol) and after incubation for 10min on ice, 10µl of  
122 10% NP-40 was added and cells were lysed by gently vortexing. The homogenate was  
123 centrifuged for 10s at 13,200rpm, the supernatant representing the cytoplasmic fraction  
124 was collected and the pellet containing the cell nuclei was washed 4 additional times in  
125 buffer A. The pellet containing the nuclear fraction was then resuspended in 100µl high-  
126 salt buffer B (20mM Hepes/KOH pH7.9, 400mM NaCl, 1mM EDTA, 1mM EGTA, 1mM  
127 β-mercaptoethanol). The lysates were sonicated and centrifuged at 4°C for 15min at  
128 13,200rpm. The supernatant representing the nuclear fraction was collected. Protein  
129 concentration was determined using the BCA assay (Thermo Fisher Scientific, Waltham, MA,  
130 USA). Lysates were mixed with SDS sample buffer and boiled for 7 min at 95 °C. Equal  
131 amounts of protein were separated by SDS-PAGE, followed by semidry blotting to a  
132 polyvinylidene difluoride membrane (Thermo Fisher Scientific). After blocking of the  
133 membrane with 5% (w/v) non-fat dried milk dissolved in Tris buffered saline (TBS) with 0.1%  
134 v/v Tween-20 (TBST), membranes were incubated with the primary antibodies overnight at  
135 4°C. Appropriate secondary antibodies coupled to horseradish peroxidase were detected by  
136 enhanced chemiluminescence using Clarity™ Western ECL Blotting Substrate (Bio-Rad,  
137 Hercules, CA, USA). Resulting protein bands were quantified and normalised to each lane's  
138 loading control using the ImageStudio Lite software (LI-COR). For whole cell extracts, the  
139 protein of interest was normalised against ACTIN or GADPH. LAMIN was used as an internal  
140 control for nuclear extracts and TUBULIN or GADPH were used as controls for cytoplasmic  
141 extracts.

#### 142 **Cell viability assay**

143 Alamar Blue (Thermo Fisher Scientific) was used to determine cell viability after drug  
144 treatment. HaCaT cells were seeded in 96-well plates to 50–60% confluency and treated the  
145 next day with the corresponding compounds for 48 hours. After treatment, Alamar Blue was  
146 added to the wells (1:10 ratio) and after four hours of incubation at 37 °C the fluorescence  
147 was measured (excitation 550 and an emission at 590 nm) using a microplate reader  
148 (Spectramax m2). Viability was calculated relative to the DMSO treated control.

#### 149 **Statistical analysis**

150 Experiments were repeated at least 2-5 times with multiple technical replicates to be  
151 eligible for the indicated statistical analyses. Data were analysed using Graphpad Prism  
152 statistical package. All results are presented as mean  $\pm$  SD unless otherwise mentioned. The  
153 differences between groups were analysed using one-way ANOVA.

154

#### 155 **Results**

156 **CDDO-derivatives, but not CDDO, reduce BACH1 levels.** We have previously shown in  
157 immortalised human keratinocytes (HaCaT cells), that the classical NRF2 activator  
158 sulforaphane (SFN) is a weak *HMOX1* inducer (but a very good inducer of the NRF2  
159 transcriptional target *AKR1B10*), while BACH1 degraders such as hemin strongly induce  
160 *HMOX1* (in an NRF2-independent manner) without affecting *AKR1B10* expression [27, 28].  
161 This emphasizes that although *HMOX1* has often been used as a surrogate for NRF2 activity,  
162 in some cases *AKR1B10* induction might be a more appropriate reporter for NRF2 activation  
163 while *HMOX1* induction is a better surrogate for BACH1 inhibition. To answer whether the  
164 observed limited effect of SFN on *HMOX1* in HaCaT cells is a general phenomenon for NRF2  
165 activators we compared three potent NRF2 activators (SFN, CDDO and TBE31) against a  
166 BACH1 degrader (hemin) for their ability to induce *HMOX1* in these cells. As shown in **figure**



167 **1A**, all three NRF2 activators were weak *HMOX1* inducers when compared with hemin but  
168 potent inducers of *AKR1B10* expression.

169

170 Since CDDO-Me is more potent than CDDO at inducing *HMOX1* expression in some cellular  
171 models, we tested whether CDDO-Me and CDDO had a differential effect on *HMOX1*  
172 transcription in HaCaT cells. CDDO-Me was significantly more potent than CDDO at inducing  
173 *HMOX1* expression, although both compounds were equally potent at inducing *AKR1B10*  
174 (**Fig. 1B**), suggesting that their differential effect on *HMOX1* must be NRF2-independent.

175 Next, we hypothesised that, in addition to activating NRF2, CDDO-Me might be targeting  
176 BACH1. To test this, we compared the effect that CDDO and CDDO-Me had on BACH1 and  
177 NRF2 protein levels. As shown in **figure 1C**, CDDO-Me - but not CDDO - reduced BACH1  
178 protein levels and greatly induced *HMOX1*, while both compounds equally stabilised NRF2.

179 Since other CDDO-derivatives are also potent *HMOX1* inducers, we hypothesised that they  
180 might also reduce BACH1 protein levels. To test this, we compared the effect of various  
181 CDDO-derivatives on BACH1 and NRF2 protein levels as well as *HMOX1* and *AKR1B10*  
182 expression. Of the derivatives tested, CDDO-TFEA and CDDO-Me were the most potent  
183 compounds at reducing BACH1 levels (**Suppl. Fig S1A**) and at inducing *HMOX1* expression  
184 (**Suppl. Fig S1B**). All compounds (CDDO and derivatives) induced *AKR1B10* to a similar extent

185 (**Suppl. Fig S1B**). Based on their potency, we focused on CDDO-TFEA and CDDO-Me  
186 (structures shown in **Suppl. Fig S1C**) and performed a time course analysis of their effect on  
187 BACH1 levels. Our results show that BACH1 reduction appears to be maximal between three  
188 and six hours, and that this effect is not observed at 16 hours (**Fig. 1 D**). Neither CDDO-TFEA  
189 nor CDDO-Me reduced cell viability at the concentrations used in various cellular systems  
190 (**Suppl. Fig. S1D**).

191

192 **The differential effect of CDDO and CDDO-derivatives on *HMOX1* expression is due to**

193 **BACH1 inhibition**. Reportedly, some CDDO-derivatives still increase *HMOX1* protein levels in

194 the absence of NRF2 [29], although the factor responsible for that induction has not been

195 identified. To test whether in our system the differential effect of CDDO-TFEA and CDDO-Me

196 versus CDDO was dependent on NRF2, we compared wild type (WT) and NRF2-KO HaCaT

197 cells. We found that both CDDO-TFEA and CDDO-Me were more potent than CDDO at

198 inducing *HMOX1* in WT cells, and a similar pattern (although with reduced fold induction)

199 was observed in NRF2-KO cells (**Fig. 2A**), demonstrating that the differential effect between

200 CDDO and CDDO-TFEA/Me was indeed not related to NRF2. On the other hand, *AKR1B10*

201 induction in WT cells was similar for the three compounds and was completely abolished in

202 the absence of NRF2 (**Fig. 2B**). We used a complementary approach with an immortalised

203 human proximal tubular kidney cell line (HK2) to test if the observed NRF2-independent

204 differential effect of CDDO-derivatives on *HMOX1* was cell-type specific. Using CRISPR/Cas9

205 gene editing, we produced an isogenic HK2 cell line with hyperactive NRF2 that cannot be

206 further stabilised by activators (NRF2-GOF cells) (Cell line validation in **Suppl. Fig S2A**). In

207 this cell line, CDDO failed to induce *HMOX1* any further while CDDO-Me and CDDO-TFEA still

208 potently induced *HMOX1* (**Suppl. Fig. S2B**), confirming that this differential induction does

209 not depend on NRF2 stabilisation. In agreement with the results obtained in HaCaT cells, the

210 three compounds equally induced *AKR1B10* in WT HK2 cells but failed to induce it further in

211 NRF2-GOF HK2 cells (**Suppl. Fig. S2C**).

212 As BACH1 is a key regulator of *HMOX1* expression, we hypothesised that the differential

213 effect between CDDO and CDDO-derivatives must be due to their differential activity on

214 BACH1, and that the strong effect of CDDO-derivatives on *HMOX1* expression relates to the

215 combination of NRF2 stabilisation and BACH1 reduction. To test this, we compared the  
216 three compounds in BACH1-KO and in BACH1/NRF2-KO HaCaT cells. In BACH1-KO cells, the  
217 differential effect between CDDO and CDDO-derivatives on *HMOX1* was lost (**Fig. 2C left**  
218 *panel*), suggesting that BACH1 is indeed responsible for that effect (comparison between  
219 Fig. 2C and 2A), and that NRF2 (or another factor) might be responsible for the remaining  
220 observed induction. In fact, in double BACH1/NRF2-KO cells the effect of the compounds on  
221 *HMOX1* expression was largely abolished, highlighting the relevance of both factors  
222 regulating *HMOX1* (**Fig. 2C right panel**).

223

224 **CDDO-derivatives reduce BACH1 nuclear levels while accumulating cytoplasmic BACH1**

225 **levels in a NRF2-independent manner.** Our results demonstrate that CDDO-derivatives, but  
226 not CDDO, reduce the levels of BACH1, and that this reduction is responsible for their  
227 differential effect on *HMOX1* expression. However, the reduction of BACH1 levels was less  
228 than expected based on the strong *HMOX1* induction (which was similar to that observed  
229 with the potent BACH1 degrader hemin). Furthermore, although CDDO-derivatives were still  
230 robust inducers of *HMOX1* in other cell lines (such as HK2 cells, the lung cancer cells H1299  
231 and A549, or the human hepatic stellate cell line LX2), in contrast to HaCaT cells (**Fig. 1B**),  
232 they did not affect the BACH1 levels (**Suppl. Fig. S3A-S3D**), which was intriguing. As some of  
233 the compounds that target BACH1 for degradation do so by first inducing its nuclear export  
234 [25], we wondered whether CDDO-derivatives might affect the balance between  
235 nuclear/cytoplasmic BACH1 and whether the compound effect could be on nuclear BACH1  
236 (the active pool). Indeed, while in HK2, LX2, H1299 and A549 cells the effect of CDDO-  
237 derivatives on total BACH1 (whole cell extract) was insignificant (**Suppl. Fig. S3A-S3D**), by  
238 using subcellular fractionation we observed that CDDO-Me and CDDO-TFEA significantly

239 reduced nuclear BACH1 while increasing its cytoplasmic levels (**Fig. 3A-3D**). This explains the  
240 apparent lack of effect on total BACH1 levels (as the cytoplasmic accumulation would mask  
241 its nuclear reduction) and the strong *HMOX1* induction (as nuclear BACH1 represents the  
242 transcriptionally active pool).

243

244 Additionally, as these compounds are potent NRF2 activators and NRF2 induces BACH1  
245 expression [33, 34], we tested whether NRF2 was necessary for the effect of CDDO-  
246 derivatives on BACH1 nuclear and cytoplasmic levels. To do this, we performed time course  
247 experiments in WT and NRF2-KO HaCaT cells. The absence of NRF2 did not impair the  
248 reduction in nuclear BACH1 nor its cytoplasmic accumulation (comparison between **Suppl**  
249 **Fig. S3E and S3F**), strongly suggesting that NRF2 is not required for either of these effects. In  
250 agreement, potent NRF2 activators such as CDDO or TBE31 did not induce BACH1  
251 cytoplasmic accumulation or promote its nuclear reduction (**Suppl Fig. S3G**).

252

253 **How are CDDO-derivatives affecting BACH1 levels?** The nuclear reduction and cytoplasmic  
254 accumulation of BACH1 in response to CDDO-TFEA/Me could be explained in different ways:  
255 1- The two effects are not linked: e.g. CDDO-derivatives induce BACH1 nuclear degradation  
256 and independently, BACH1 cytoplasmic accumulation, either by increasing the protein  
257 stability or the transcript levels of BACH1.

258 2- The two effects are linked: e.g. CDDO-derivatives affect the nuclear export of BACH1.

259

260 We next tested these two possible explanations:

261 **Is BACH1 protein stability affected by the CDDO-derivatives?** The two main pathways  
262 controlling protein degradation are the ubiquitin-proteasome system and autophagy. To

263 study the involvement of the ubiquitin-proteasome system we used MG132 (proteasome  
264 inhibitor) and MLN 4924 (an inhibitor of NEDD8 activating enzyme, which acts by inhibiting  
265 all Cullin RING ligases). Although both inhibitors increased the basal levels of BACH1, neither  
266 of them abolished the effect of CDDO-TFEA/Me on BACH1 (**Fig. 4A**), suggesting that  
267 degradation of BACH1 via the proteasome is not the main mechanism by which the CDDO-  
268 derivatives reduce levels of BACH1. To address the potential role of autophagy, we used the  
269 autophagy inhibitor bafilomycin A1, which did not impair the effect of CDDO-Me/TFEA on  
270 BACH1 protein levels (**Suppl Fig. S4A**).

271 Hemin (the best-characterised BACH1 degrader) binds to BACH1, promoting its proteasomal  
272 degradation, and thus our results suggest that CDDO-derivatives and hemin might have  
273 different mechanisms of action. To address this, we reconstituted BACH1-KO cells with  
274 either BACH1-WT or a BACH1 hemin-resistant mutant, in which four cysteines in the haem-  
275 binding site were mutated to alanine (Hemin-resistant) [25, 35]. Although both hemin and  
276 the CDDO-derivatives efficiently reduced nuclear levels of BACH1-WT, only CDDO-TFEA/Me  
277 reduced the levels of the hemin-resistant BACH1 mutant (**Fig. 4B**). These results further  
278 confirm that the mechanism of BACH1 reduction by CDDO-TFEA/Me is different from that of  
279 hemin.

280 Is BACH1 transcription affected by the CDDO-derivatives? As BACH1 protein stability did not  
281 seem to be affected by CDDO-TFEA/Me, we tested if BACH1 transcriptional regulation was  
282 responsible for its cytoplasmic accumulation. To test this, we used compounds to inhibit  
283 either protein synthesis (cycloheximide, a protein synthesis inhibitor) or transcription  
284 (actinomycin D, a DNA-directed RNA synthesis inhibitor). Neither of these inhibitors blocked  
285 BACH1 nuclear reduction or its cytoplasmic accumulation in response to CDDO-TFEA/Me

286 **(Suppl Fig. S4B)**, suggesting that synthesis of new proteins (and their transcription) is not  
287 needed for the effect of the CDDO-derivatives on BACH1.

288 Is BACH1 nuclear export affected by the CDDO-derivatives? So far, our results showed that  
289 neither transcriptional regulation nor protein degradation are mechanisms responsible for  
290 the effect of CDDO-TFEA/Me, suggesting that the CDDO-derivatives might be reducing  
291 nuclear BACH1 and accumulating its cytoplasmic pool via a nuclear export mechanism.  
292 While small molecules (20-40 kD) can passively diffuse between the nucleus and the  
293 cytoplasm, transport of larger molecules such as proteins involves signal-dependent  
294 mechanisms. Many nuclear export substrates contain a nuclear export signal (NES) that  
295 binds the export receptor CRM1 (exportin 1/Xpo1), which is sensitive to inhibitors such as  
296 leptomycin B and selinexor. However, not all proteins that shuttle between the nucleus and  
297 cytoplasm use CRM1 to do so, and CRM1-independent nuclear export pathways have been  
298 identified [36-40]. To address whether the changes in nuclear and cytoplasmic BACH1 in  
299 response to CDDO-TFEA/Me are related to a CRM1-dependent nuclear export mechanism,  
300 we tested the effect of two CRM1 inhibitors (leptomycin B and selinexor) **(Suppl. Fig S4C)**.  
301 Although both inhibitors induced a basal nuclear accumulation of BACH1, as expected,  
302 neither of them abolished its nuclear reduction nor its cytoplasmic accumulation in  
303 response to CDDO-TFEA/Me. Overall, our data suggest that CDDO-derivatives induce BACH1  
304 nuclear export in a CRM1-independent manner.

305

## 306 **Discussion**

307 Our results demonstrate that CDDO-derivatives - but not CDDO - inhibit BACH1, explaining  
308 their greater potency as *HMOX1* inducers in comparison with CDDO. Although we did not  
309 identify the mechanism(s) responsible for the ability of CDDO-derivatives to reduce nuclear

310 BACH1 levels, our data show that neither the proteasome nor the nuclear export receptor  
311 CRM1 are involved, demonstrating that CDDO-derivatives use a mechanism different from  
312 the one used by hemin. This highlights the need to better understand the mechanisms  
313 controlling BACH1 regulation. Additionally, the differential effect observed in the levels of  
314 nuclear and cytoplasmic BACH1 shows that nuclear reduction of BACH1 (without further  
315 cytoplasmic degradation) is sufficient for a strong *HMOX1* induction. This should be taken  
316 into consideration in the design of screening strategies to identify BACH1 inhibitors, as only  
317 looking at total BACH1 levels in cells could be misleading. It would be interesting to address  
318 whether the accumulation of cytoplasmic BACH1 may have other functions that are  
319 unrelated to its well-characterized role as transcriptional regulator.

320

321 Our data demonstrate that both CDDO-TFEA and CDDO-Me are very potent dual KEAP1 and  
322 BACH1 inhibitors, which could explain some of their therapeutic benefits. Importantly our  
323 study provides a rationale for their potential clinical development for conditions affected by  
324 BACH1, such as bone destructive diseases [16], non-alcoholic steatohepatitis [22],  
325 atherosclerosis [23], insulin resistance [20], coronary artery disease [41], aging related  
326 conditions [17] and tumour metastasis [33, 34, 42-46].

## **FUNDING**

This work was supported by the Medical Research Institute of the University of Dundee, Cancer Research UK (C52419/A22869 and C20953/A18644) (LV and ADK), Tenovus Scotland (T18/07) (LC) and Medical Research Scotland (PhD-50058-2019). DO was supported by the Lundbeck Foundation (R335-2019-2138), Kræftens Bekæmpelse (R279-A16218), the

Brødrene Hartman Fond, the Hørslev Fond, the fabrikant Einer Willumsens mindelegat, and the Eva og Henry Fraenkels Mindefond.

## **AUTHORS CONTRIBUTION**

LC, RM, MH, SDN, GN, AEK, EBS, WL and LC conducted the experiments and were responsible for initial data analysis, figure preparation and statistical analysis. TH and TBP provided resources and technical expertise. LV, DO and ADK had a leading contribution in the design of the study, and an active role in the discussion and interpretation of the whole dataset. LV wrote the original draft of the manuscript. ADK, DO and LC reviewed and edited the manuscript. Funding acquisition LV, DO and ADK. All the authors take full responsibility for the work.

## **DECLARATION OF INTERESTS**

ADK is a member of the Scientific Advisory Board of Evgen Pharma, and a consultant for Aclipse Therapeutics.

## **References**

1. Wang Y, Porter WW, Suh N, Honda T, Gribble GW, Leesnitzer LM, et al. A synthetic triterpenoid, 2-cyano-3,12-dioxooleana-1,9-dien-28-oic acid (CDDO), is a ligand for the peroxisome proliferator-activated receptor gamma. *Mol Endocrinol*. 2000;14(10):1550-6.
2. Konopleva M, Tsao T, Ruvolo P, Stiouf I, Estrov Z, Leysath CE, et al. Novel triterpenoid CDDO-Me is a potent inducer of apoptosis and differentiation in acute myelogenous leukemia. *Blood*. 2002;99(1):326-35.
3. Liby K, Royce DB, Williams CR, Risingsong R, Yore MM, Honda T, et al. The synthetic triterpenoids CDDO-methyl ester and CDDO-ethyl amide prevent lung cancer induced by vinyl carbamate in A/J mice. *Cancer Res*. 2007;67(6):2414-9.
4. Sun K, Li M, Konopleva M, Konoplev S, Stephens LC, Kornblau SM, et al. The synthetic triterpenoid, CDDO, suppresses alloreactive T cell responses and reduces murine early acute graft-versus-host disease mortality. *Biol Blood Marrow Transplant*. 2007;13(5):521-9.



5. Tran TA, McCoy MK, Sporn MB, Tansey MG. The synthetic triterpenoid CDDO-methyl ester modulates microglial activities, inhibits TNF production, and provides dopaminergic neuroprotection. *J Neuroinflammation*. 2008;5:14.
6. Liby K, Hock T, Yore MM, Suh N, Place AE, Risingsong R, et al. The synthetic triterpenoids, CDDO and CDDO-imidazolide, are potent inducers of heme oxygenase-1 and Nrf2/ARE signaling. *Cancer Res*. 2005;65(11):4789-98.
7. Cuadrado A, Rojo AI, Wells G, Hayes JD, Cousin SP, Rumsey WL, et al. Therapeutic targeting of the NRF2 and KEAP1 partnership in chronic diseases. *Nat Rev Drug Discov*. 2019;18(4):295-317.
8. Sporn MB, Liby KT, Yore MM, Fu L, Lopchuk JM, Gribble GW. New synthetic triterpenoids: potent agents for prevention and treatment of tissue injury caused by inflammatory and oxidative stress. *J Nat Prod*. 2011;74(3):537-45.
9. Yamamoto M, Kensler TW, Motohashi H. The KEAP1-NRF2 System: a Thiol-Based Sensor-Effector Apparatus for Maintaining Redox Homeostasis. *Physiol Rev*. 2018;98(3):1169-203.
10. Dayalan Naidu S, Muramatsu A, Saito R, Asami S, Honda T, Hosoya T, et al. C151 in KEAP1 is the main cysteine sensor for the cyanoenone class of NRF2 activators, irrespective of molecular size or shape. *Sci Rep*. 2018;8(1):8037.
11. Dinkova-Kostova AT, Liby KT, Stephenson KK, Holtzclaw WD, Gao X, Suh N, et al. Extremely potent triterpenoid inducers of the phase 2 response: correlations of protection against oxidant and inflammatory stress. *Proc Natl Acad Sci U S A*. 2005;102(12):4584-9.
12. Sun J, Hoshino H, Takaku K, Nakajima O, Muto A, Suzuki H, et al. Hemoprotein Bach1 regulates enhancer availability of heme oxygenase-1 gene. *EMBO J*. 2002;21(19):5216-24.
13. Dhakshinamoorthy S, Jain AK, Bloom DA, Jaiswal AK. Bach1 competes with Nrf2 leading to negative regulation of the antioxidant response element (ARE)-mediated NAD(P)H:quinone oxidoreductase 1 gene expression and induction in response to antioxidants. *J Biol Chem*. 2005;280(17):16891-900.
14. Shan Y, Lambrecht RW, Donohue SE, Bonkovsky HL. Role of Bach1 and Nrf2 in up-regulation of the heme oxygenase-1 gene by cobalt protoporphyrin. *FASEB J*. 2006;20(14):2651-3.
15. Reichard JF, Motz GT, Puga A. Heme oxygenase-1 induction by NRF2 requires inactivation of the transcriptional repressor BACH1. *Nucleic Acids Res*. 2007;35(21):7074-86.
16. Wada S, Kanzaki H, Katsumata Y, Yamaguchi Y, Narimiya T, Attucks OC, et al. Bach1 Inhibition Suppresses Osteoclastogenesis via Reduction of the Signaling via Reactive Oxygen Species by Reinforced Antioxidation. *Front Cell Dev Biol*. 2020;8:740.
17. Zhang H, Zhou L, Davies KJA, Forman HJ. Silencing Bach1 alters aging-related changes in the expression of Nrf2-regulated genes in primary human bronchial epithelial cells. *Arch Biochem Biophys*. 2019;672:108074.
18. Tian X, Cong F, Guo H, Fan J, Chao G, Song T. Downregulation of Bach1 protects osteoblasts against hydrogen peroxide-induced oxidative damage in vitro by enhancing the activation of Nrf2/ARE signaling. *Chem Biol Interact*. 2019;309:108706.

19. Attucks OC, Jasmer KJ, Hannink M, Kassis J, Zhong Z, Gupta S, et al. Induction of heme oxygenase I (HMOX1) by HPP-4382: a novel modulator of Bach1 activity. *PLoS One*. 2014;9(7):e101044.
20. Kondo K, Ishigaki Y, Gao J, Yamada T, Imai J, Sawada S, et al. Bach1 deficiency protects pancreatic beta-cells from oxidative stress injury. *Am J Physiol Endocrinol Metab*. 2013;305(5):E641-8.
21. Harusato A, Naito Y, Takagi T, Uchiyama K, Mizushima K, Hirai Y, et al. BTB and CNC homolog 1 (Bach1) deficiency ameliorates TNBS colitis in mice: role of M2 macrophages and heme oxygenase-1. *Inflamm Bowel Dis*. 2013;19(4):740-53.
22. Inoue M, Tazuma S, Kanno K, Hyogo H, Igarashi K, Chayama K. Bach1 gene ablation reduces steatohepatitis in mouse MCD diet model. *J Clin Biochem Nutr*. 2011;48(2):161-6.
23. Watari Y, Yamamoto Y, Brydun A, Ishida T, Mito S, Yoshizumi M, et al. Ablation of the bach1 gene leads to the suppression of atherosclerosis in bach1 and apolipoprotein E double knockout mice. *Hypertens Res*. 2008;31(4):783-92.
24. Sun J, Brand M, Zenke Y, Tashiro S, Groudine M, Igarashi K. Heme regulates the dynamic exchange of Bach1 and NF-E2-related factors in the Maf transcription factor network. *Proc Natl Acad Sci U S A*. 2004;101(6):1461-6.
25. Suzuki H, Tashiro S, Hira S, Sun J, Yamazaki C, Zenke Y, et al. Heme regulates gene expression by triggering Crm1-dependent nuclear export of Bach1. *EMBO J*. 2004;23(13):2544-53.
26. Zenke-Kawasaki Y, Dohi Y, Katoh Y, Ikura T, Ikura M, Asahara T, et al. Heme induces ubiquitination and degradation of the transcription factor Bach1. *Mol Cell Biol*. 2007;27(19):6962-71.
27. Casares L, Garcia V, Garrido-Rodriguez M, Millan E, Collado JA, Garcia-Martin A, et al. Cannabidiol induces antioxidant pathways in keratinocytes by targeting BACH1. *Redox Biol*. 2020;28:101321.
28. Casares L, Unciti-Broceta JD, Prados ME, Caprioglio D, Mattoteia D, Higgins M, et al. Isomeric O-methyl cannabidiolquinones with dual BACH1/NRF2 activity. *Redox Biol*. 2020;37:101689.
29. To C, Ringelberg CS, Royce DB, Williams CR, Risingsong R, Sporn MB, et al. Dimethyl fumarate and the oleanane triterpenoids, CDDO-imidazolid and CDDO-methyl ester, both activate the Nrf2 pathway but have opposite effects in the A/J model of lung carcinogenesis. *Carcinogenesis*. 2015;36(7):769-81.
30. Torrente L, Sanchez C, Moreno R, Chowdhry S, Cabello P, Isono K, et al. Crosstalk between NRF2 and HIPK2 shapes cytoprotective responses. *Oncogene*. 2017;36(44):6204-12.
31. Saito A, Zheng SQ, Takahashi M, Li W, Ojima I, Honda T. An Improved Synthesis of a Hydroxymethyl Tricyclic Ketone from Cyclohexanone, the Key Processes for the Synthesis of a Highly Potent Anti-inflammatory and Cytoprotective Agent. *Synthesis-Stuttgart*. 2013;45(23):3251-4.

32. Honda T, Yoshizawa H, Sundararajan C, David E, Lajoie MJ, Favaloro FG, Jr., et al. Tricyclic compounds containing nonenolizable cyano enones. A novel class of highly potent anti-inflammatory and cytoprotective agents. *J Med Chem*. 2011;54(6):1762-78.
33. Wiel C, Le Gal K, Ibrahim MX, Jahangir CA, Kashif M, Yao H, et al. BACH1 Stabilization by Antioxidants Stimulates Lung Cancer Metastasis. *Cell*. 2019;178(2):330-45 e22.
34. Lignitto L, LeBoeuf SE, Homer H, Jiang S, Askenazi M, Karakousi TR, et al. Nrf2 Activation Promotes Lung Cancer Metastasis by Inhibiting the Degradation of Bach1. *Cell*. 2019;178(2):316-29 e18.
35. Ogawa K, Sun J, Taketani S, Nakajima O, Nishitani C, Sassa S, et al. Heme mediates derepression of Maf recognition element through direct binding to transcription repressor Bach1. *EMBO J*. 2001;20(11):2835-43.
36. Wiechens N, Fagotto F. CRM1- and Ran-independent nuclear export of beta-catenin. *Curr Biol*. 2001;11(1):18-27.
37. Vajjhala PR, Macmillan E, Gonda T, Little M. The Wilms' tumour suppressor protein, WT1, undergoes CRM1-independent nucleocytoplasmic shuttling. *FEBS Lett*. 2003;554(1-2):143-8.
38. Saijou E, Itoh T, Kim KW, Iemura S, Natsume T, Miyajima A. Nucleocytoplasmic shuttling of the zinc finger protein EZI Is mediated by importin-7-dependent nuclear import and CRM1-independent export mechanisms. *J Biol Chem*. 2007;282(44):32327-37.
39. Thomas M, Lischka P, Muller R, Stamminger T. The cellular DExD/H-box RNA-helicases UAP56 and URH49 exhibit a CRM1-independent nucleocytoplasmic shuttling activity. *PLoS One*. 2011;6(7):e22671.
40. Huang C, Jiang JY, Chang SC, Tsay YG, Chen MR, Chang MF. Nuclear export signal-interacting protein forms complexes with lamin A/C-Nups to mediate the CRM1-independent nuclear export of large hepatitis delta antigen. *J Virol*. 2013;87(3):1596-604.
41. von Scheidt M, Zhao Y, de Aguiar Vallim TQ, Che N, Wierer M, Seldin MM, et al. Transcription Factor MAFF (MAF Basic Leucine Zipper Transcription Factor F) Regulates an Atherosclerosis Relevant Network Connecting Inflammation and Cholesterol Metabolism. *Circulation*. 2021;143(18):1809-23.
42. Sato M, Matsumoto M, Saiki Y, Alam M, Nishizawa H, Rokugo M, et al. BACH1 Promotes Pancreatic Cancer Metastasis by Repressing Epithelial Genes and Enhancing Epithelial-Mesenchymal Transition. *Cancer Res*. 2020;80(6):1279-92.
43. Han W, Zhang Y, Niu C, Guo J, Li J, Wei X, et al. BTB and CNC homology 1 (Bach1) promotes human ovarian cancer cell metastasis by HMGA2-mediated epithelial-mesenchymal transition. *Cancer Lett*. 2019;445:45-56.
44. Shajari N, Davudian S, Kazemi T, Mansoori B, Salehi S, Khaze Shahgoli V, et al. Silencing of BACH1 inhibits invasion and migration of prostate cancer cells by altering metastasis-related gene expression. *Artif Cells Nanomed Biotechnol*. 2018;46(7):1495-504.
45. Davudian S, Shajari N, Kazemi T, Mansoori B, Salehi S, Mohammadi A, et al. BACH1 silencing by siRNA inhibits migration of HT-29 colon cancer cells through reduction of metastasis-related genes. *Biomed Pharmacother*. 2016;84:191-8.

46. Liang Y, Wu H, Lei R, Chong RA, Wei Y, Lu X, et al. Transcriptional network analysis identifies BACH1 as a master regulator of breast cancer bone metastasis. *J Biol Chem.* 2012;287(40):33533-44.

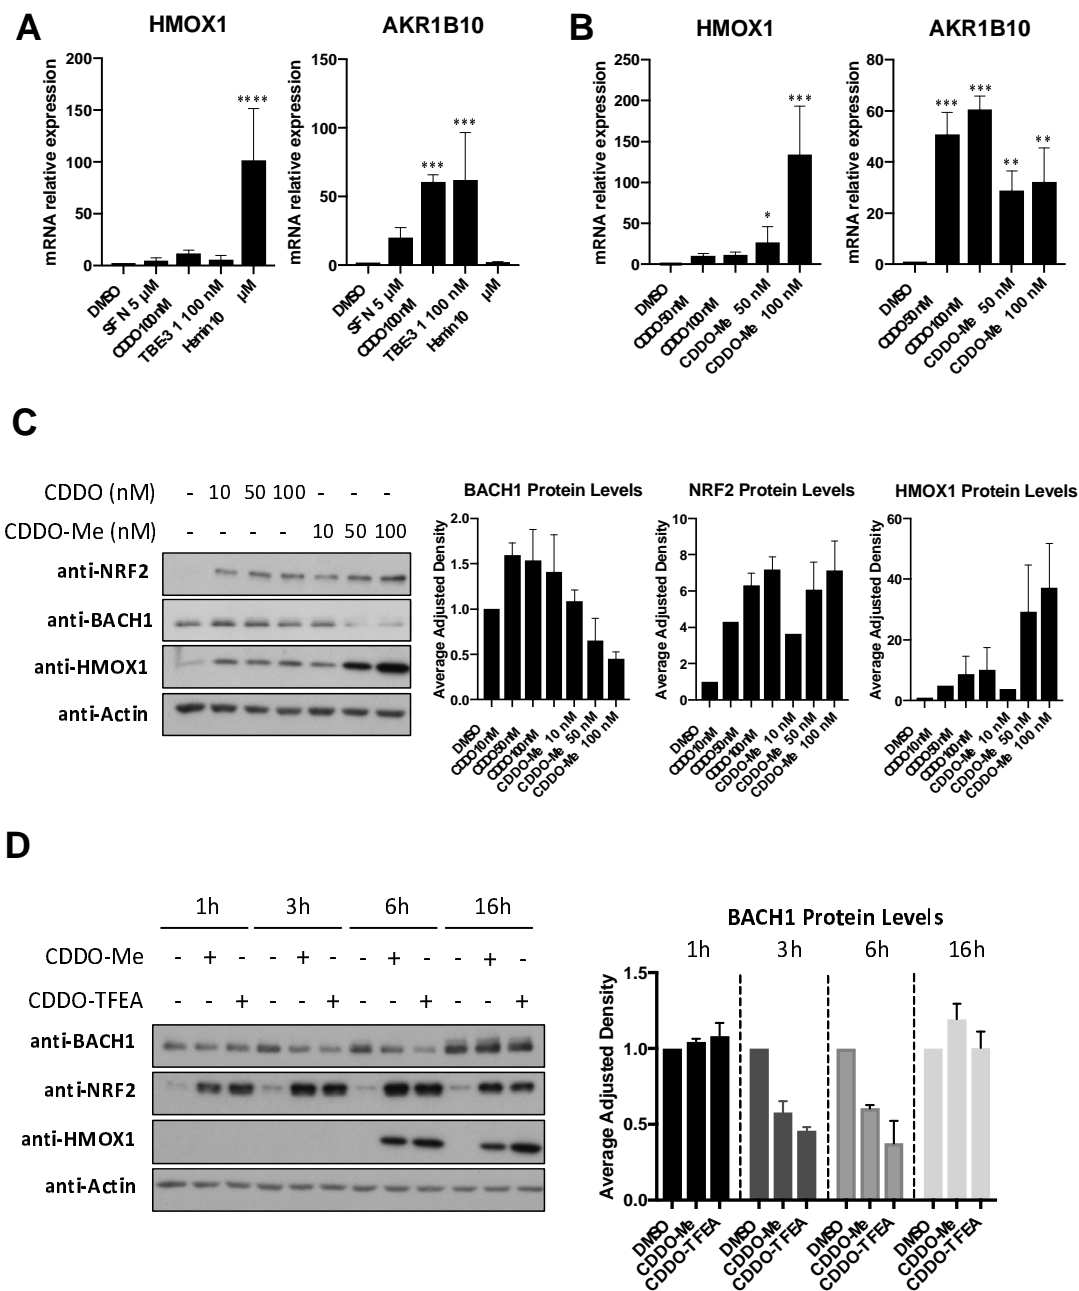

**Figure 1**

**Figure 1. CDDO derivatives, but not CDDO, reduce BACH1 levels (A)** HaCaT cells were treated with either DMSO (0.1%, v/v), SFN (5  $\mu$ M), CDDO (100 nM), TBE-31 (100 nM) or Hemin (10  $\mu$ M) for 16h. Cells were lysed and mRNA levels of *HMOX1* and *AKR1B10* were analysed by qRT-PCR, using *HPRT1* as a housekeeping gene. **(B)** As in A, but HaCaT cells were

treated with either DMSO (0.1%, v/v) or increasing concentrations of CDDO or CDDO-Me. After 16 hours cells were harvested and lysed and mRNA levels of *HMOX1* and *AKR1B10* were analysed by real-time qPCR. Data were normalised using *HPRT1* as an internal control (n= 3) and are expressed relative to the DMSO treated sample. **(C)** HaCaT cells were treated with DMSO (0.1%, v/v) or increasing concentrations of CDDO or CDDO-Me. Five hours later, cells were harvested and lysed. Protein levels of NRF2, BACH1, HMOX1 and ACTIN were analysed by Western Blot. Left panel shows a representative blot and right panels show quantification of NRF2 and HMOX1 protein levels against the loading control. Data represent means  $\pm$  SD (n= 3) and are expressed relative to the DMSO-treated samples. **(D)** HaCaT cells were treated with either DMSO (0.1%, v/v), CDDO-Me (100 nM) or CDDO-TFEA (100 nM) for 1h, 3h, 6h or 16h. Cells were harvested, lysed and analysed for the levels of the indicated proteins. Left panel is a representative blot; right panels are the quantification of BACH1 levels (n= 3). Data are expressed relative to the DMSO-treated samples for each time point and were normalized against their respective loading controls (DMSO sample for each time point set to 1). \*P  $\leq$  0.05, \*\*P  $\leq$  0.01, \*\*\*P  $\leq$  0.001, \*\*\*\*P  $\leq$  0.0001.

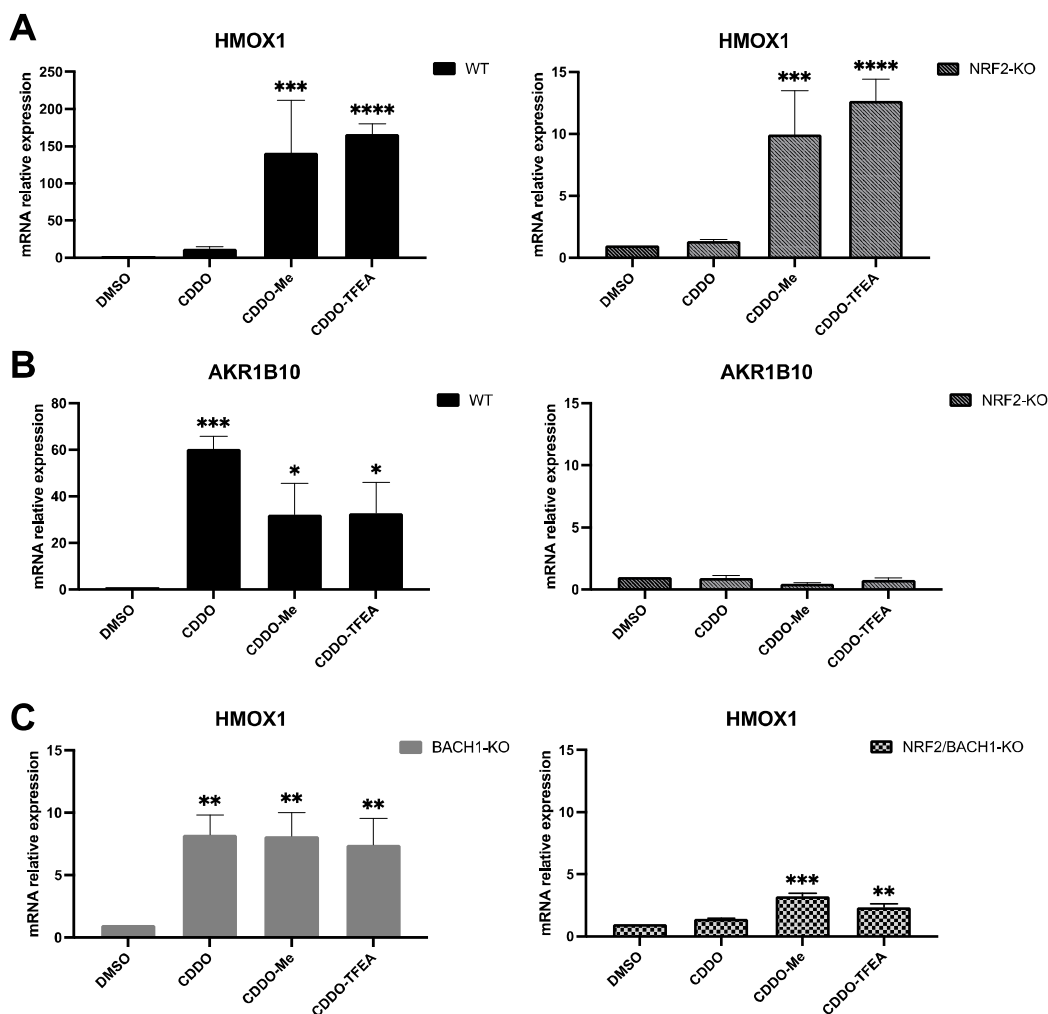

**Figure 2**

**Figure 2. The differential effect of CDDO and CDDO/TFEA on *HMOX1* is BACH1-dependent and NRF2-independent. (A,B)** HaCaT WT or NRF2-KO cells were treated with either DMSO (0.1%, v/v), CDDO (100 nM), CDDO-Me (100 nM) or CDDO-TFEA (100 nM) for 16h. Samples were collected and mRNA levels of *HMOX1* (A) and *AKR1B10* (B) were analysed via real-time qPCR, using *HPRT1* as an internal control. Data are expressed relative to the DMSO-treated samples in each cell line (DMSO in WT and NRF2-KO cells set to 1). **(C)** HaCaT BACH1-KO and HaCaT NRF2/BACH1-KO cells were treated as above. Levels of *HMOX1* were analysed by qRT-PCR as previously described. *HMOX1* levels in the DMSO samples of each cell line were

set to 1 and the rest of the data are expressed relative to their corresponding DMSO

sample. \*P ≤ 0.05, \*\*P ≤ 0.01, \*\*\*P ≤ 0.001, \*\*\*\*P ≤ 0.0001.



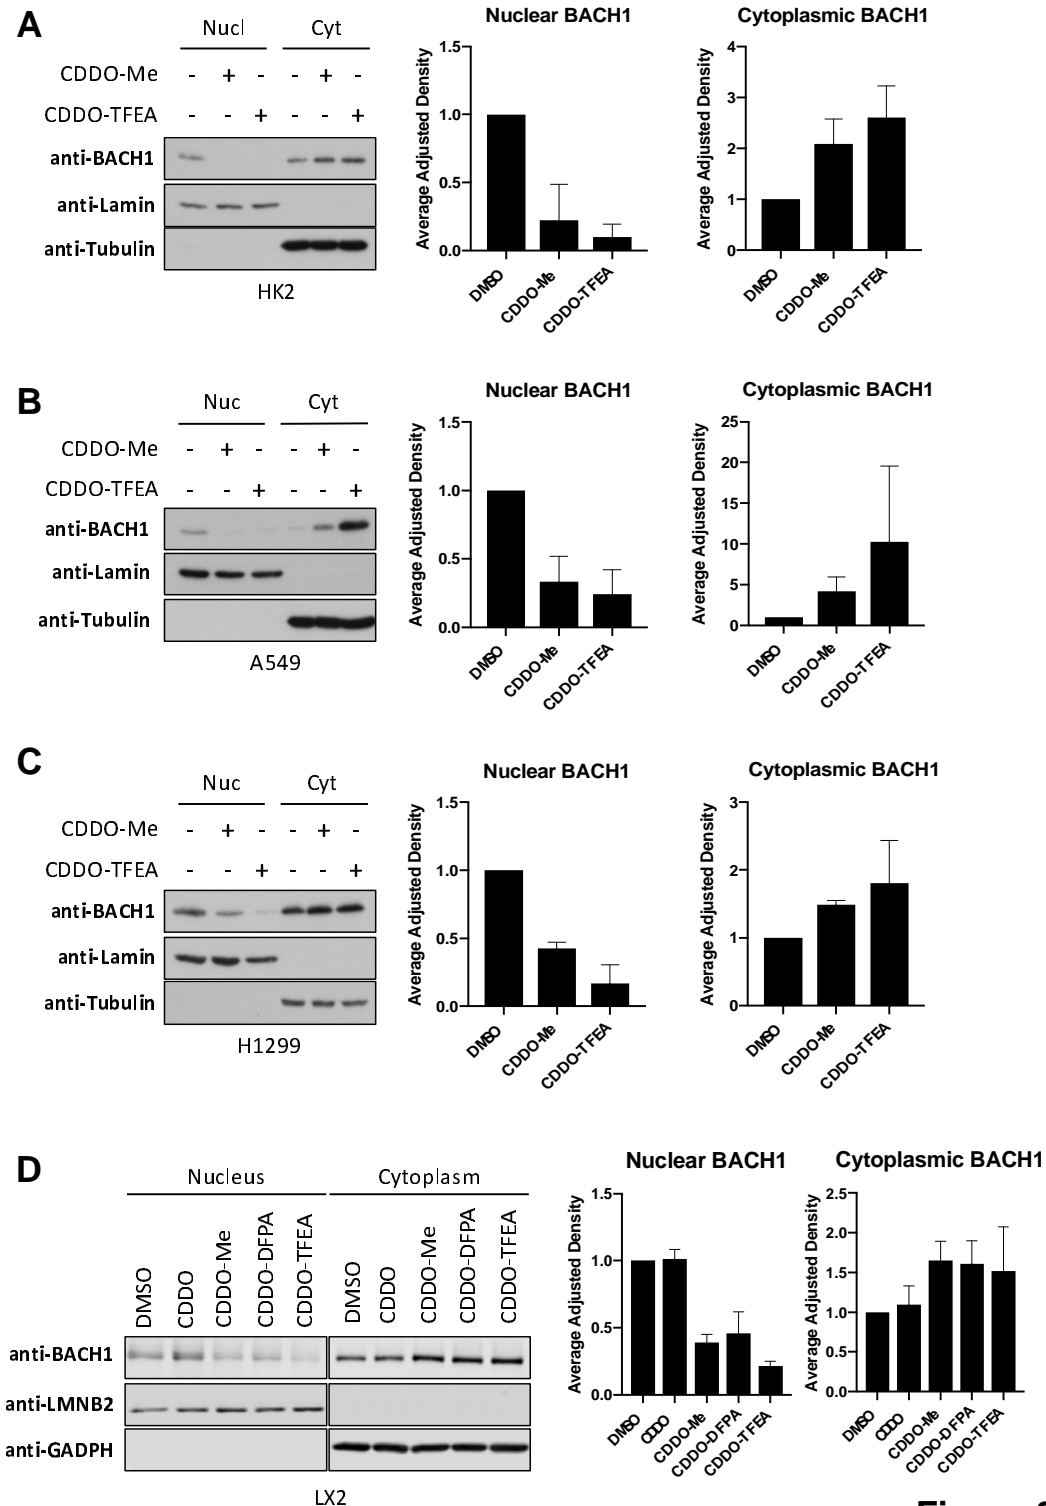

**Figure 3**

Figure 3. CDDO-derivatives reduce nuclear BACH1 levels while increasing cytoplasmic BACH1 levels. (A-D) HK2 (A), A549 (B), H1299 (C) or LX2 (D) cells were treated with DMSO

(0.1%, v/v), CDDO-Me (100 nM) or CDDO-TFEA (100 nM). Six hours later cells were harvested and subcellular fractionation was performed. BACH1 protein levels were analysed via western blot. Panels on the left show a representative blot; panels on the right are the corresponding BACH1 nuclear and cytoplasmic quantifications, which were normalised against their internal control (i.e., LAMIN for nuclear and TUBULIN for cytoplasmic levels). Data represent means  $\pm$  SD (n= 3) and are expressed relative to the DMSO-treated samples.

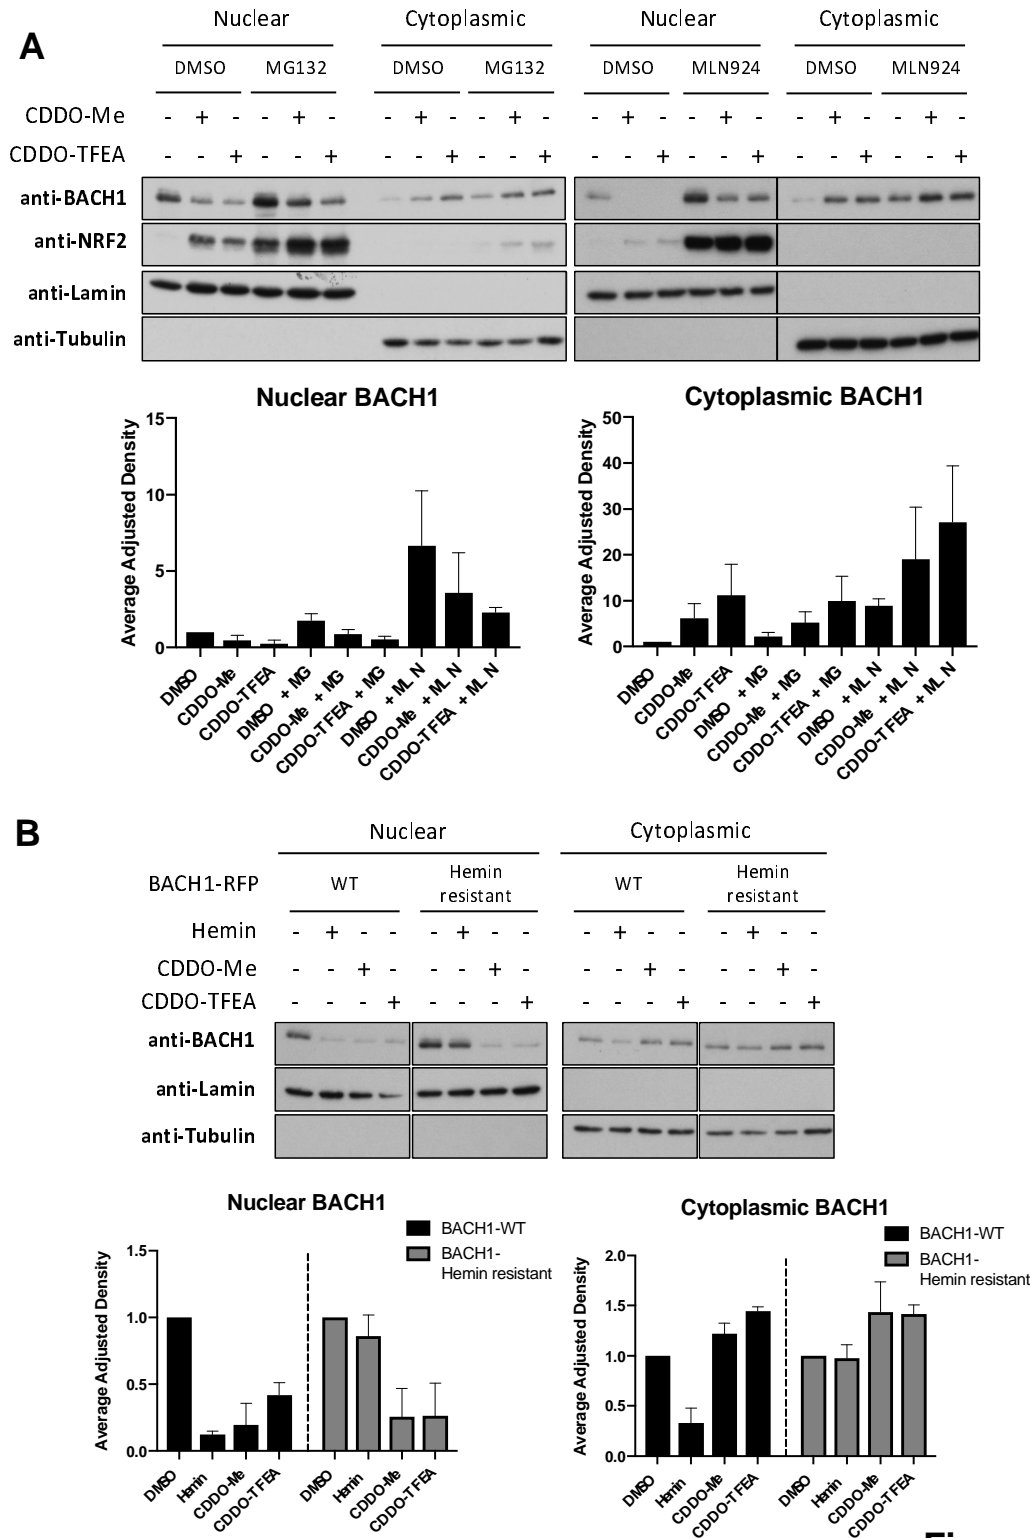

**Figure 4**

Figure 4. CDDO-Me/TFEA affects BACH1 levels in a proteasome independent manner and have a mechanism of action different than hemin. (A) HaCaT cells were incubated with

either DMSO (0.1%, v/v), MG132 (10  $\mu$ M) or MLN924 (2  $\mu$ M) for one hour. After that, either DMSO (-), CDDO-Me (100 nM) or CDDO-TFEA (100 nM) was added. Six hours later, cells were harvested and nuclear/cytoplasmic fractions were isolated and analysed for their levels of BACH1 and NRF2. Upper panel is a representative blot and lower panels are the quantifications of nuclear and cytoplasmic BACH1 levels normalised against their corresponding loading control. Data represent means  $\pm$  SD (n=3) and are expressed relative to the DMSO sample. **(B)** HaCaT BACH1-KO cells reconstituted with either BACH1-RFP-WT or BACH1-RFP-Hemin resistant mutant were treated with DMSO (-), Hemin (10  $\mu$ M), CDDO-Me (100 nM) or CDDO-TFEA (100 nM) for six hours. Cells were harvested and nuclear/cytoplasmic fractions were isolated and analysed for their levels of BACH1. Upper panel is a representative blot and lower panels are the quantifications of nuclear and cytoplasmic BACH1 levels normalised against their corresponding loading control. Data represent means  $\pm$  SD (n=3) and are expressed relative to their DMSO control.

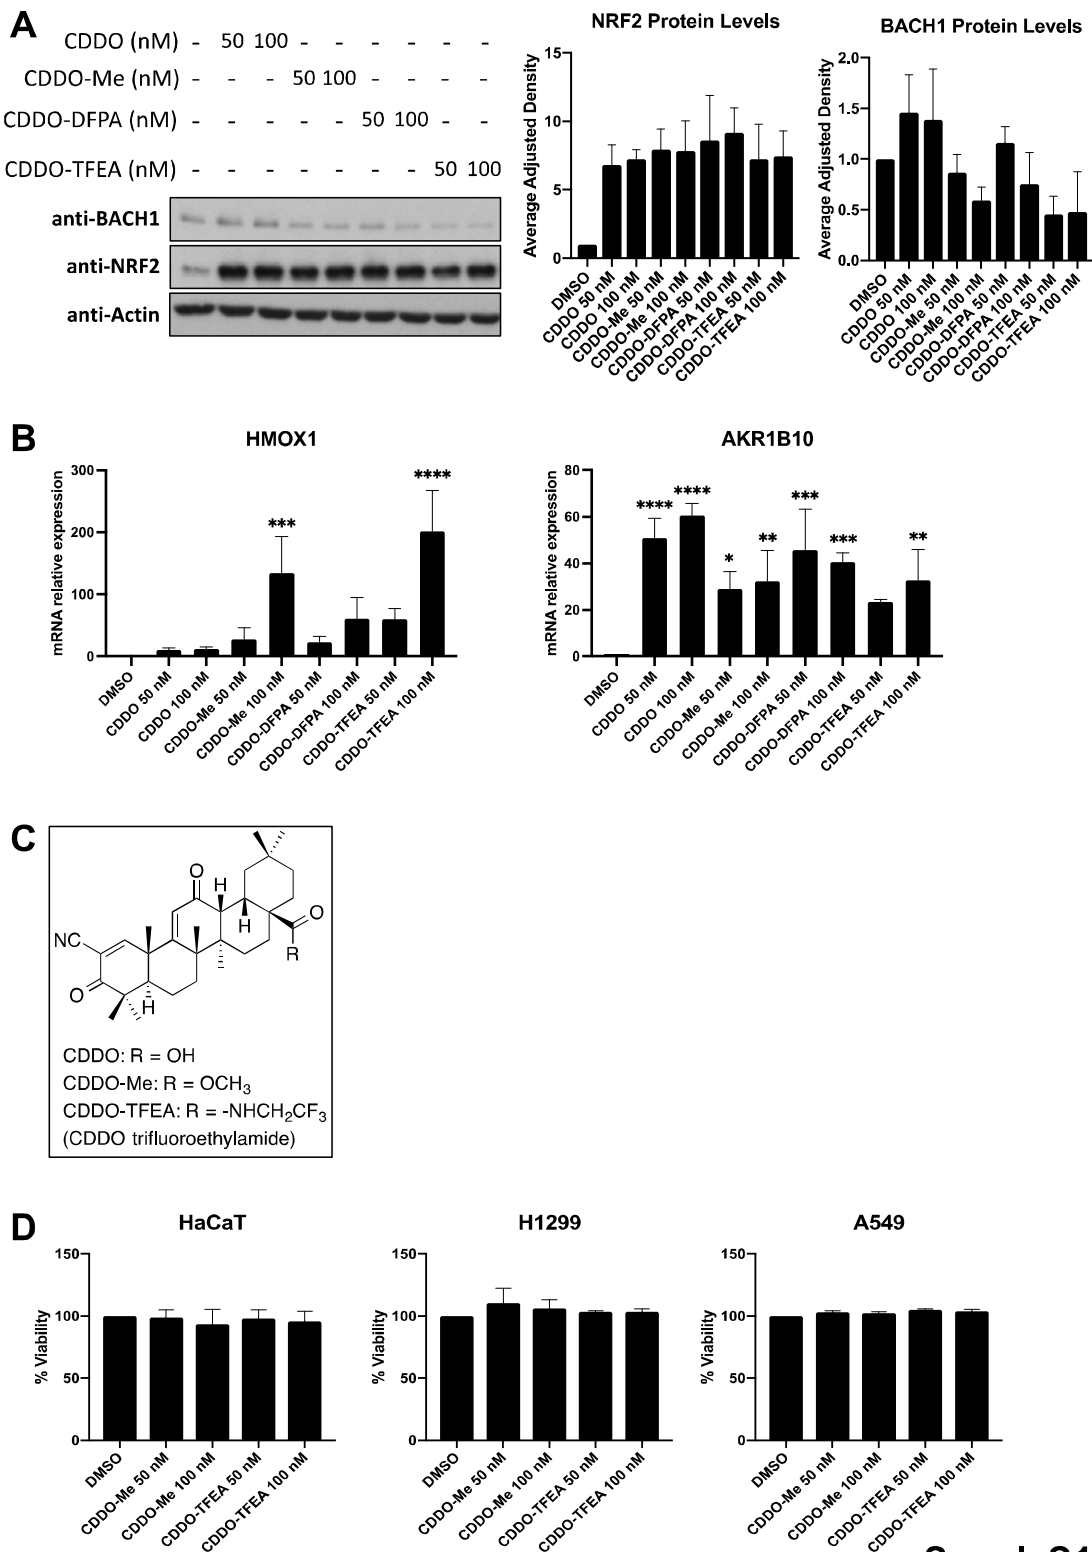

## Suppl. S1

**Suppl. Figure S1. (A)** HaCaT cells were treated with vehicle (DMSO, 0.1%, v/v) or increasing concentrations of either CDDO, CDDO-Me, CDDO-DFPA or CDDO-TFEA. After five hours cells

were lysed and samples were analysed by Western Blot. Upper panel is a representative blot and lower panels show the quantification of BACH1 and NRF2 protein levels normalized for actin levels. Data represent means  $\pm$  SD (n = 3) and are expressed relative to the DMSO-treated samples. **(B)** HaCaT cells were treated with either DMSO (0.1%, v/v) or different concentrations of CDDO, CDDO-Me, CDDO-DFPA or CDDO-TFEA. After 16 hours cells were harvested and lysed and mRNA levels of *HMOX1* and *AKR1B10* were analysed by real-time qPCR. Data were normalised using *HPRT1* as an internal control (n= 3) and are expressed relative to the DMSO treated sample. \*P  $\leq$  0.05, \*\*P  $\leq$  0.01, \*\*\*P  $\leq$  0.001, \*\*\*\*P  $\leq$  0.0001. **(C)** Structures for CDDO, CDDO-Me and CDDO-TFEA. **(D)** HaCaT, H1299 or A549 cells were treated with either DMSO (0.1%, v/v) or different concentrations of CDDO-Me or CDDO-TFEA as indicated. After 48 hours, viability was calculated relative to the DMSO-treated control using Alamar Blue.

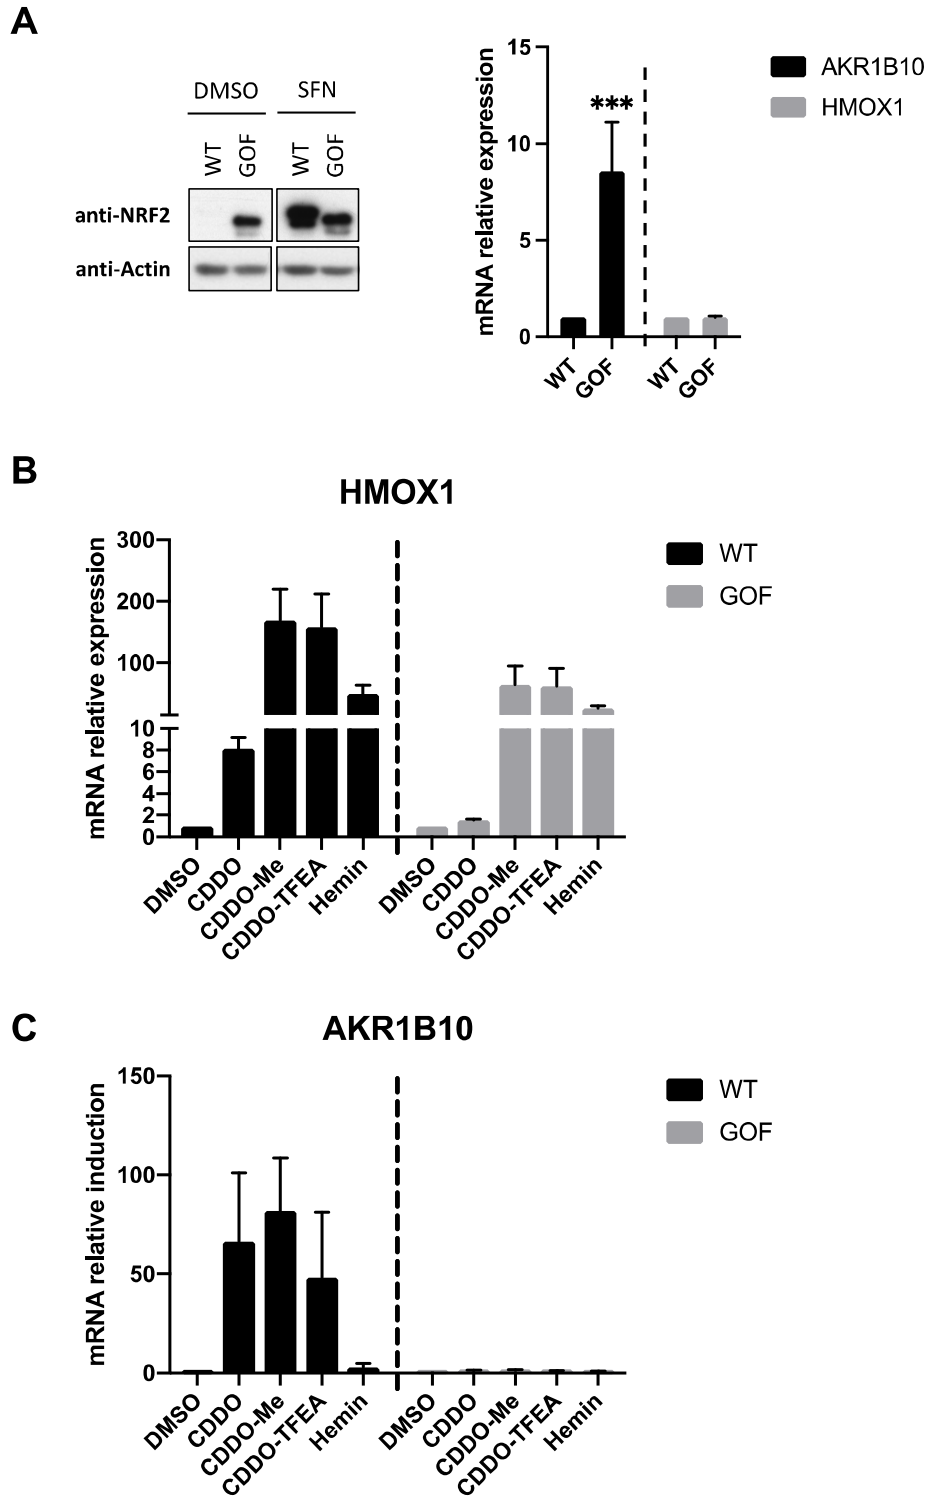

## Suppl. S2

**Suppl. Figure S2.** (A) Left panel: Control (WT) and NRF2 gain-of-function (GOF) HK2 cells were treated with either DMSO (0.1%, v/v) or sulforaphane (SFN). Three hours later the

levels of NRF2 were measured by western blot. Right panel: Basal mRNA levels of *HMOX1* and *AKR1B10* in control (WT) and NRF2-GOF HK2 cells were analysed by RT-qPCR. *HPRT1* was used as a housekeeping gene for the analysis. \*\*\* $P \leq 0.001$ . **(B,C)** HK2 Control (WT) and NRF2-GOF cells were treated with DMSO, CDDO (100 nM), CDDO-Me (100 nM), CDDO-TFEA (100 nM) or Hemin (10  $\mu$ M) for 16h. *HMOX1* (B) and *AKR1B10* (C) mRNA levels were analysed using RT-qPCR and *HPRT1* as a housekeeping gene. Data are expressed relative to the DMSO-treated samples in each cell line (DMSO in WT and NRF2-GOF cells set to 1). \* $P \leq 0.05$ .



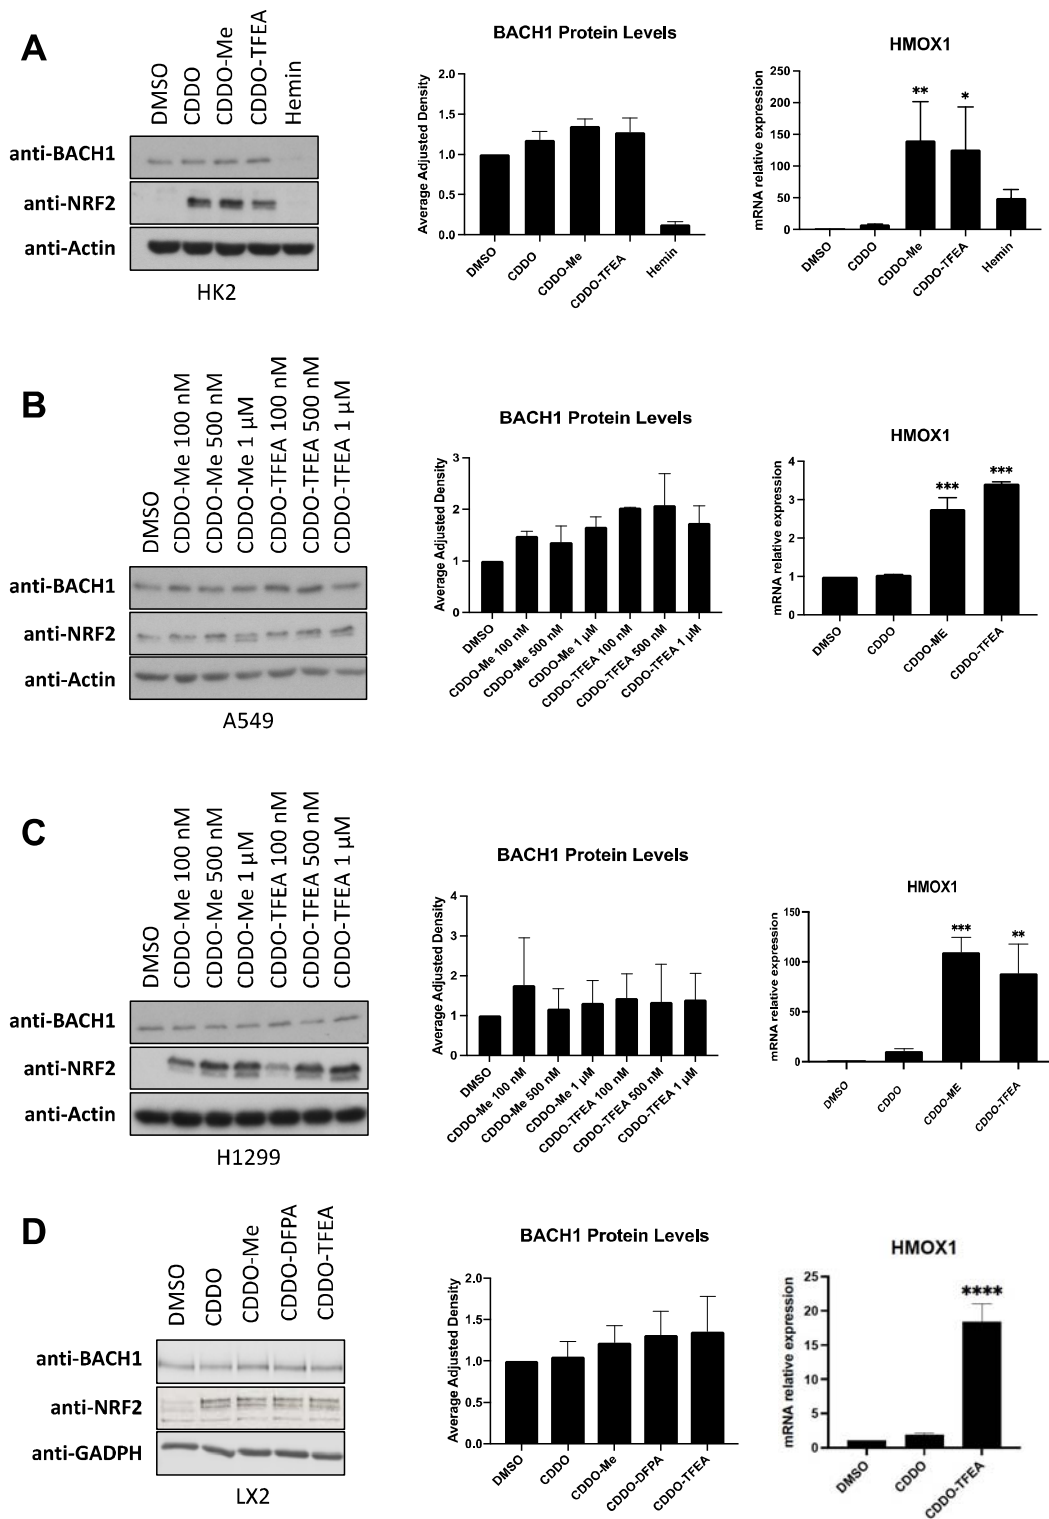

Suppl. S3

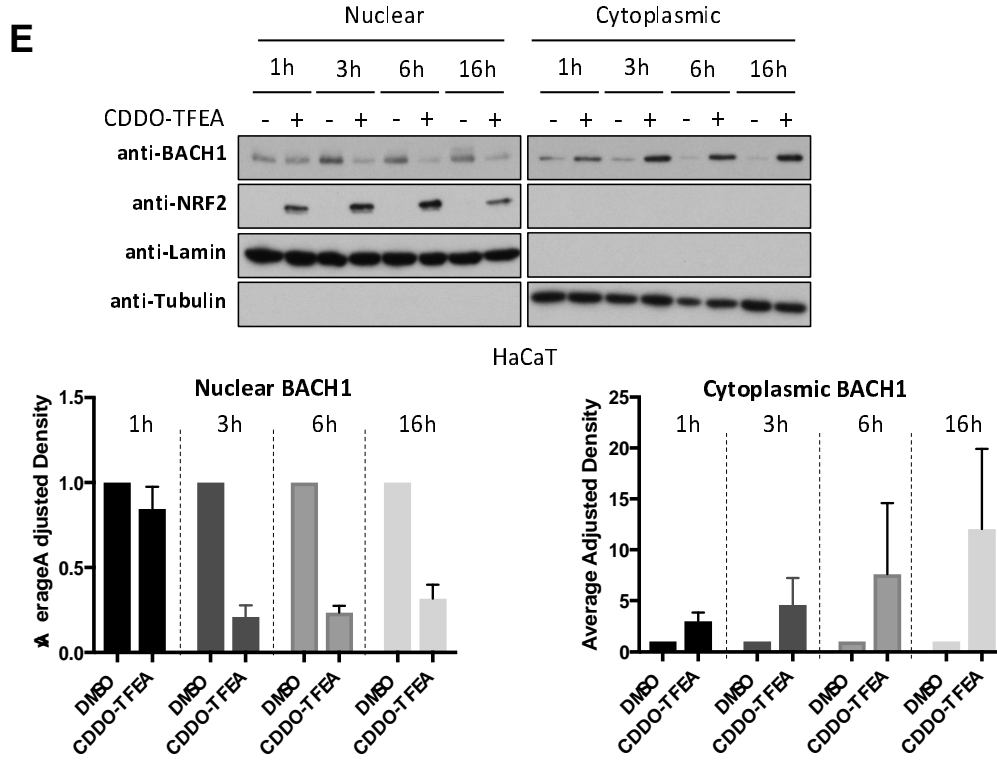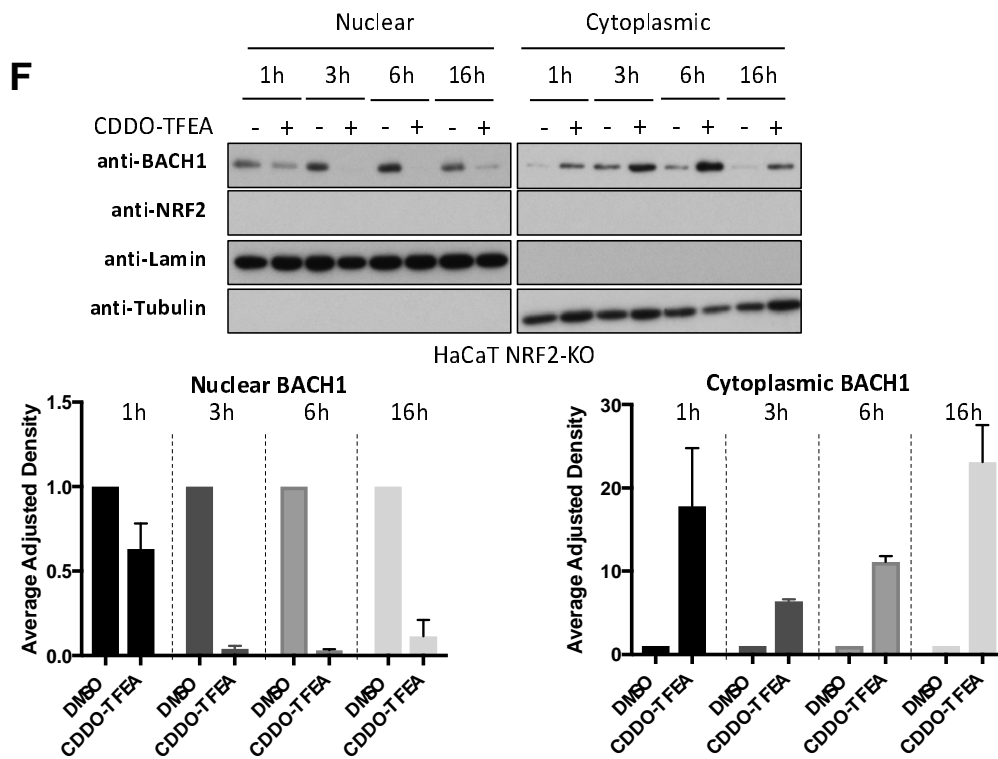

Suppl. S3

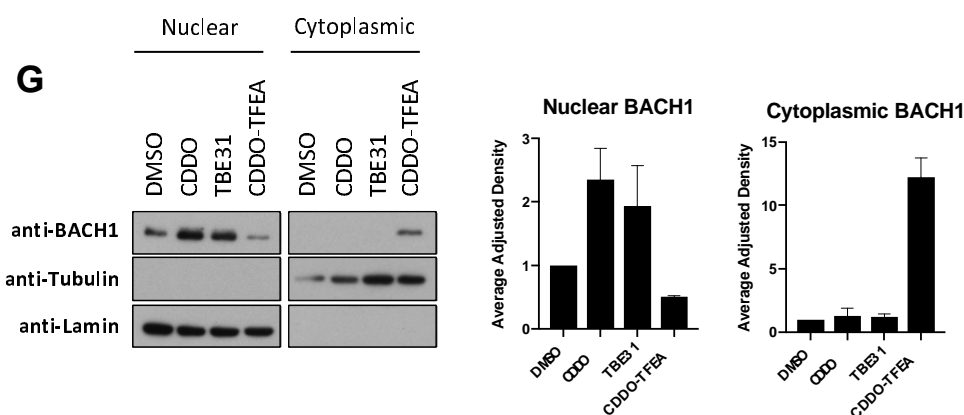

### Suppl. S3

**Suppl. Figure S3. (A)** HK2 cells were treated with DMSO, CDDO (100 nM), CDDO-Me (100 nM), CDDO-TFEA (100 nM) or hemin (10  $\mu$ M) for 6h. Cells were lysed and total BACH1, NRF2 and actin levels were analysed by western blot. Representative blot is shown on the left panel and quantification of BACH1 protein levels (n=2) is in the middle panel. Right panel: HK2 cells were treated with either DMSO (0.1%, v/v), CDDO (100 nM), CDDO-Me (100 nM), CDDO-TFEA (100 nM) or hemin (10  $\mu$ M) for 16h. *HMOX1* mRNA levels were analysed. \*P  $\leq$  0.05, \*\*P  $\leq$  0.01. **(B)** A549 cells were treated with DMSO (0.1%, v/v) or increasing concentrations of CDDO-Me or CDDO-TFEA for 6h. Left panel shows a representative blot while middle panels show quantification of BACH1 protein levels (n= 2). Right panel: A549 cells were treated with DMSO (0.1%, v/v), CDDO (100 nM), CDDO-Me (100 nM) or CDDO-TFEA (100 nM) for 6h. *HMOX1* mRNA levels were analysed. \*\*\*P  $\leq$  0.001 **(C)** H1299 cells were treated with DMSO (0.1%, v/v) or increasing concentrations of CDDO-Me or CDDO-TFEA for 16h. Left panel shows a representative blot while middle panels show quantification of BACH1 protein levels (n=2). Right panel: H1299 were treated with DMSO (0.1%, v/v), CDDO (100 nM), CDDO-Me (100 nM) or CDDO-TFEA (100 nM) for 16h. *HMOX1* mRNA levels were analysed. \*\*P  $\leq$  0.01, \*\*\*P  $\leq$  0.001. **(D)** LX2 cells were treated with DMSO

(0.1%, v/v), CDDO (50 nM), CDDO-Me (50 nM), CDDO-DFPA (50 nM) or CDDO-TFEA (50 nM) for 6h. Samples were lysed and total BACH1, NRF2 and ACTIN levels were analysed by western blot. Representative blot is shown on the left panel and quantification of BACH1 protein levels (n= 3) is in the middle panel. Right panel: LX2 cells were treated with either DMSO (0.1%, v/v), CDDO (50 nM) or CDDO-TFEA (50 nM) for 16h. *HMOX1* mRNA levels were analysed. \*P ≤ 0.05, \*\*P ≤ 0.01. **(E,F)** HaCaT WT cells (E) and NRF2-KO cells (F) were treated with DMSO (0.1%, v/v) or CDDO-TFEA (100 nM) for 1h, 3h, 6h or 16h. Cells were harvested and nuclear and cytosolic fractions were isolated and analysed for the levels of the indicated proteins. Upper panel is a representative blot; lower panels are the quantification of BACH1 nuclear and cytoplasmic levels (n= 2). Data are expressed relative to the DMSO-treated samples for each time point and were normalized against their respective loading controls (DMSO sample for each time point set to 1). **(G)** HaCaT WT cells were treated with either DMSO (0.1%, v/v), CDDO (100 nM), TBE-31 (100 nM) or CDDO-TFEA (100 nM) for six hours. Nuclear and cytosolic fractions were isolated and analysed for their levels of BACH1. Upper panel is a representative blot and lower panels show the quantification of BACH1 nuclear and cytoplasmic levels (n=2), normalized against their respective loading controls. Data is expressed relative to the DMSO treated samples.



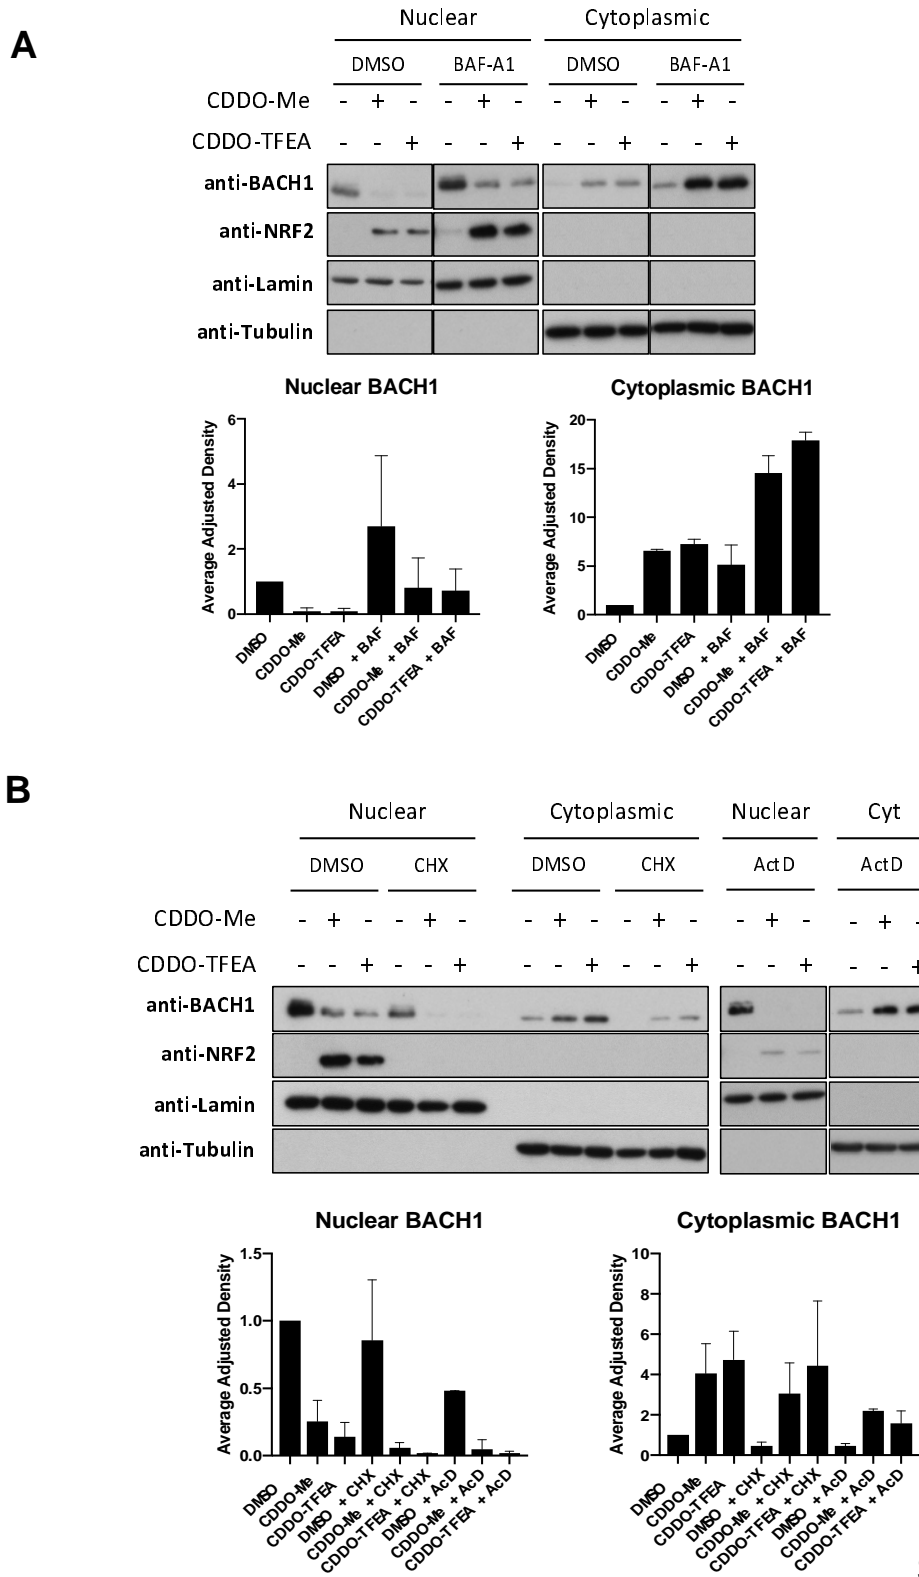

Suppl. S4

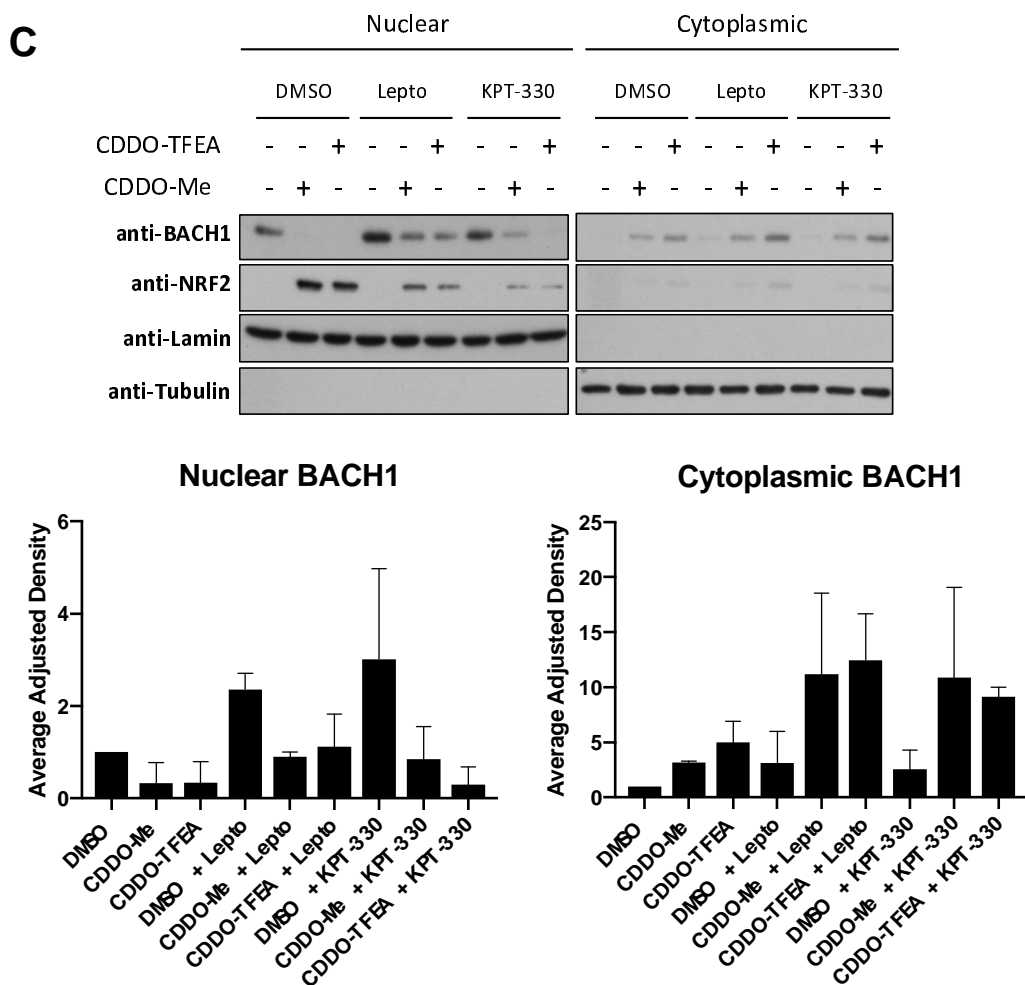

## Suppl. S4

**Suppl. Figure S4. (A)** HaCaT cells were incubated with either DMSO (0.1%, v/v) or bafilomycin A1 (BAF-A1, 100 nM). Two hours later they were treated with either DMSO (-), CDDO-Me (100 nM) or CDDO-TFEA (100 nM) for another six hours. Subcellular fractionation was performed as previously described. Upper panel is a representative blot and lower panels are the quantifications of nuclear and cytoplasmic BACH1 levels normalised against their corresponding loading control. Data represent means  $\pm$  SD (n=2) and are expressed relative to the DMSO sample. Control and BAF-A1 treated samples were all loaded in the same gel **(B)** HaCaT cells were incubated with either DMSO (0.1%, v/v), cycloheximide (CHX, 10  $\mu$ M) for 2h or actinomycin D (ActD, 1  $\mu$ g/mL) for 30 min. After that, either DMSO (-),

CDDO-Me (100 nM) or CDDO-TFEA (100 nM) was added. Six hours later, cells were harvested and nuclear/cytoplasmic fractions were isolated and analysed for their levels of BACH1 and NRF2. Upper panel is a representative blot; lower panels are the quantifications of nuclear and cytoplasmic BACH1 levels normalised against their corresponding loading control. Data represent means  $\pm$  SD (n=3) and are expressed relative to the DMSO-treated cells. **(C)** HaCaT cells were incubated with either DMSO (0.1%, v/v), leptomycin B (Lepto, 25 ng/mL) or KPT-330 (1  $\mu$ M). After two hours, either DMSO (-), CDDO-Me (100 nM) or CDDO-TFEA (100 nM) was added. Six hours later, cells were harvested and subcellular fractionation was performed. BACH1 and NRF2 protein levels were analysed by western blot. Upper panel is a representative blot and lower panels are the quantification of BACH1 nuclear and cytoplasmic levels normalised to the corresponding loading control. Data represent means  $\pm$  SD (n=3) and are expressed relative to the DMSO-treated cells.
